# Supplementary material for: Genomic regions underlying uniformity of yearling weight in Nellore cattle evaluated under different response variables
Source: PubMed Central journal article supplement (PMC6097312; doi:10.1186/s12864-018-5003-4), 2018-08-16
Supplement: 12864_2018_5003_MOESM3_ESM.pdf [file 12864_2018_5003_MOESM3_ESM.pdf]

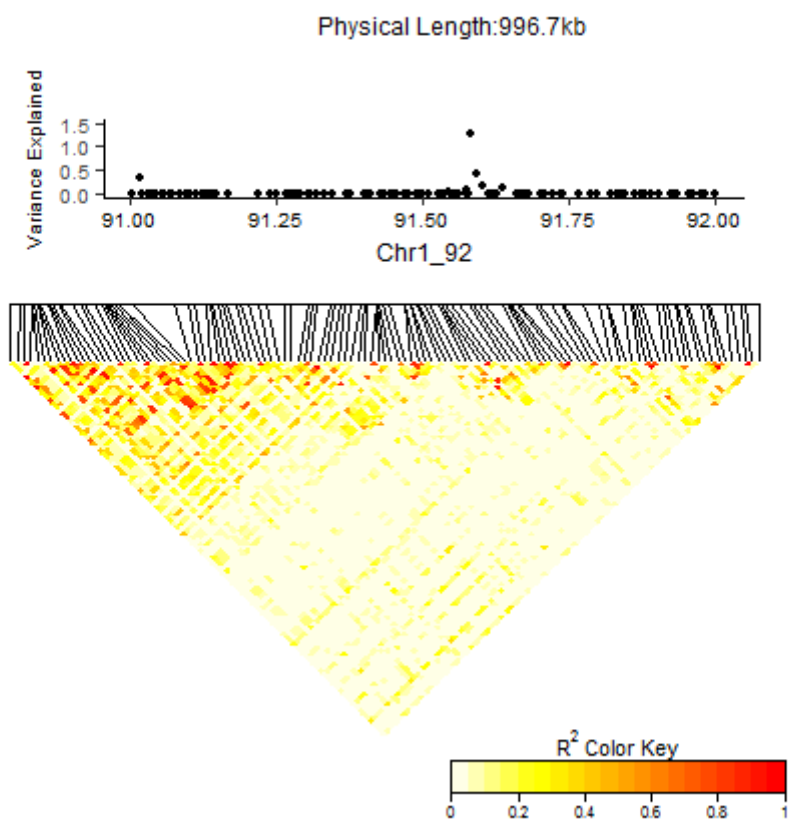

Figure 4a. Manhattan plot of the variance explained by each SNP in the window Chr1\_92 for dEBV<sub>m</sub> and linkage disequilibrium (LD;  $r^2$ )

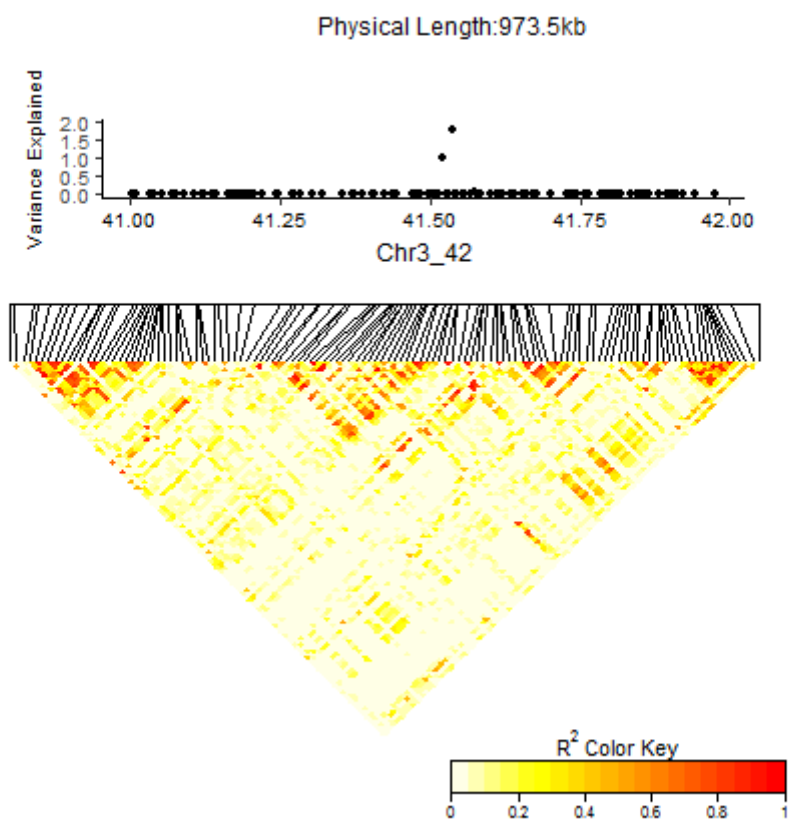

Figure 4b. Manhattan plot of the variance explained by each SNP in the window Chr3\_42 for  $dEBV_m$  and linkage disequilibrium (LD;  $r^2$ )

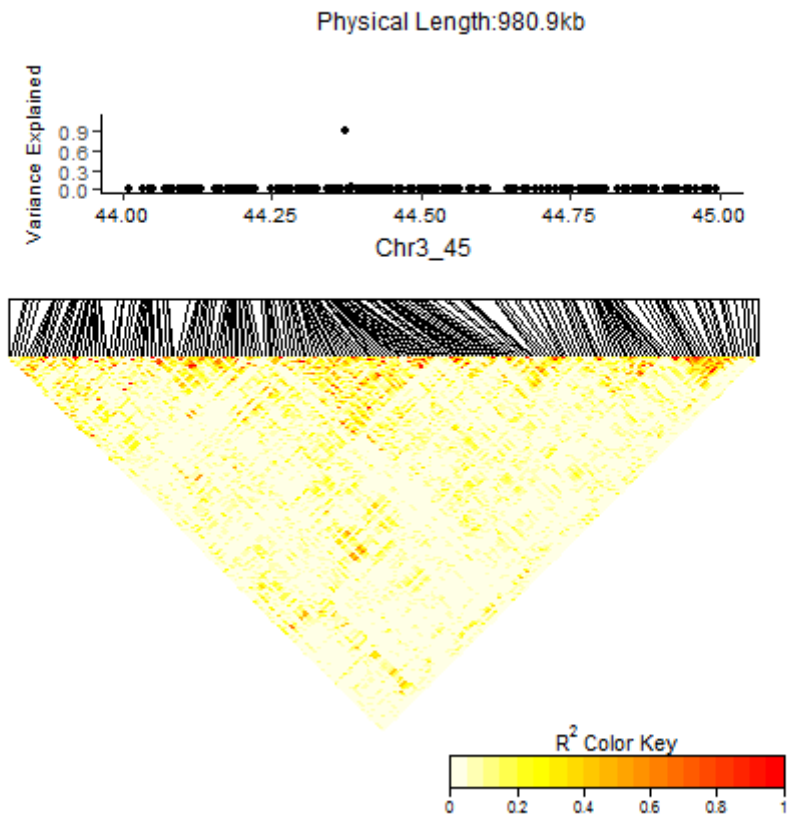

Figure 4c. Manhattan plot of the variance explained by each SNP in the window Chr3\_45 for  $dEBV_m$  and linkage disequilibrium (LD;  $r^2$ )

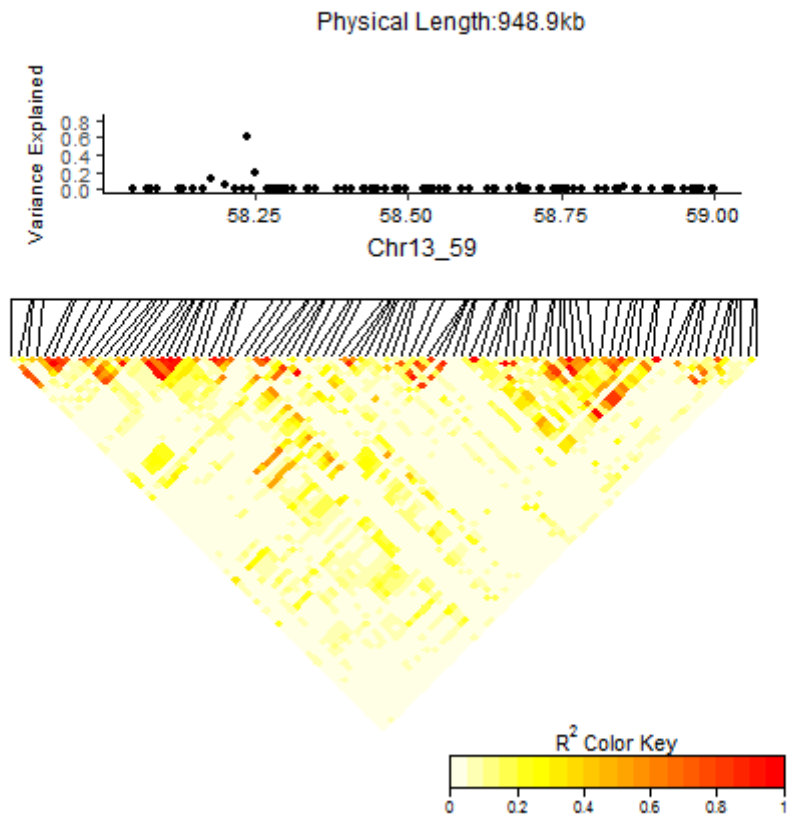

Figure 4d. Manhattan plot of the variance explained by each SNP in the window Chr13\_59 for  $dEBV_m$  and linkage disequilibrium (LD;  $r^2$ )

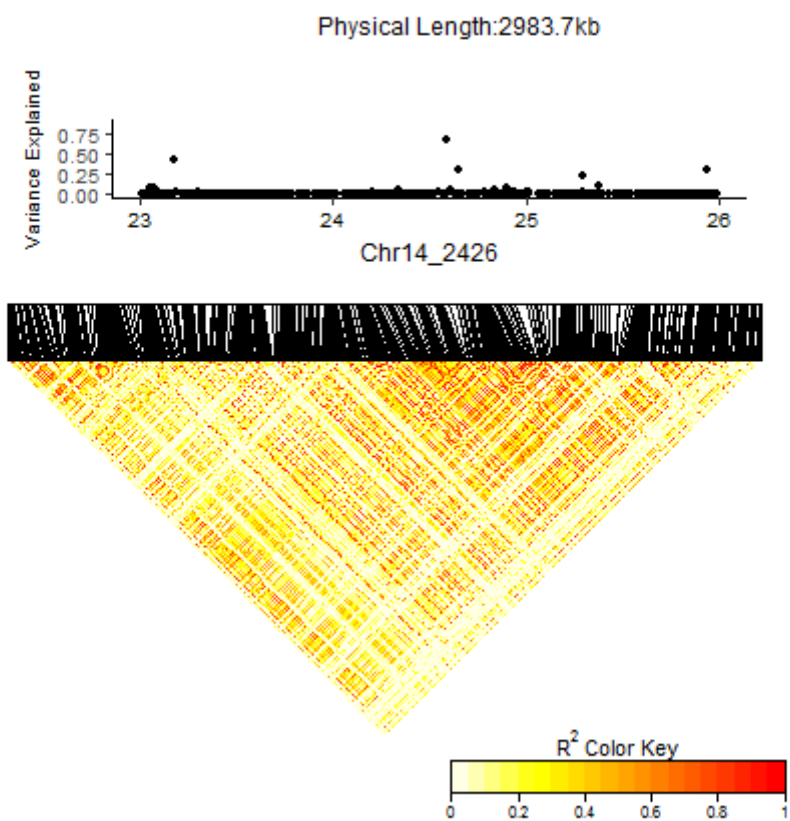

Figure 4e. Manhattan plot of the variance explained by each SNP in the window Chr14\_24:26 for dEBV<sub>m</sub> and linkage disequilibrium (LD;  $r^2$ )

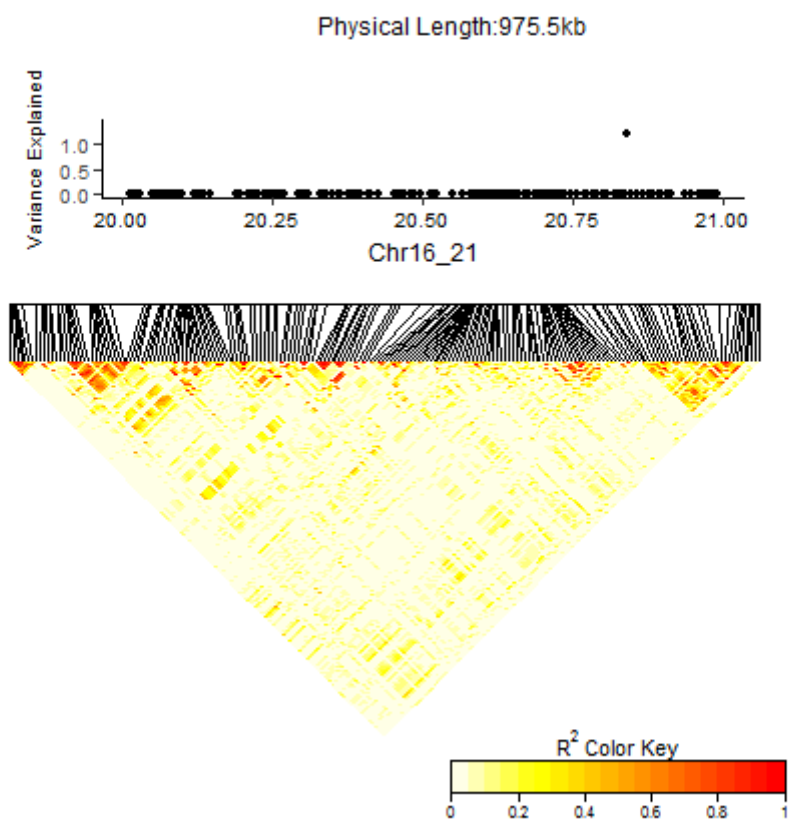

Figure 4f. Manhattan plot of the variance explained by each SNP in the window Chr16\_21 for  $dEBV_m$  and linkage disequilibrium (LD;  $r^2$ )

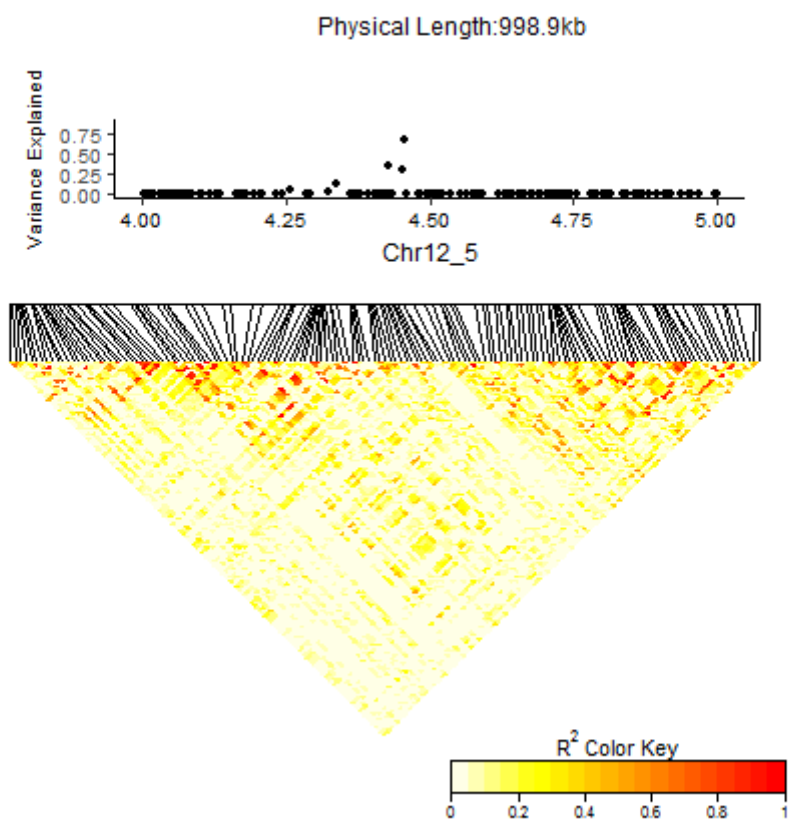

Figure 4g. Manhattan plot of the variance explained by each SNP in the window Chr12\_5 for  $dEBV_v$  and linkage disequilibrium (LD;  $r^2$ )

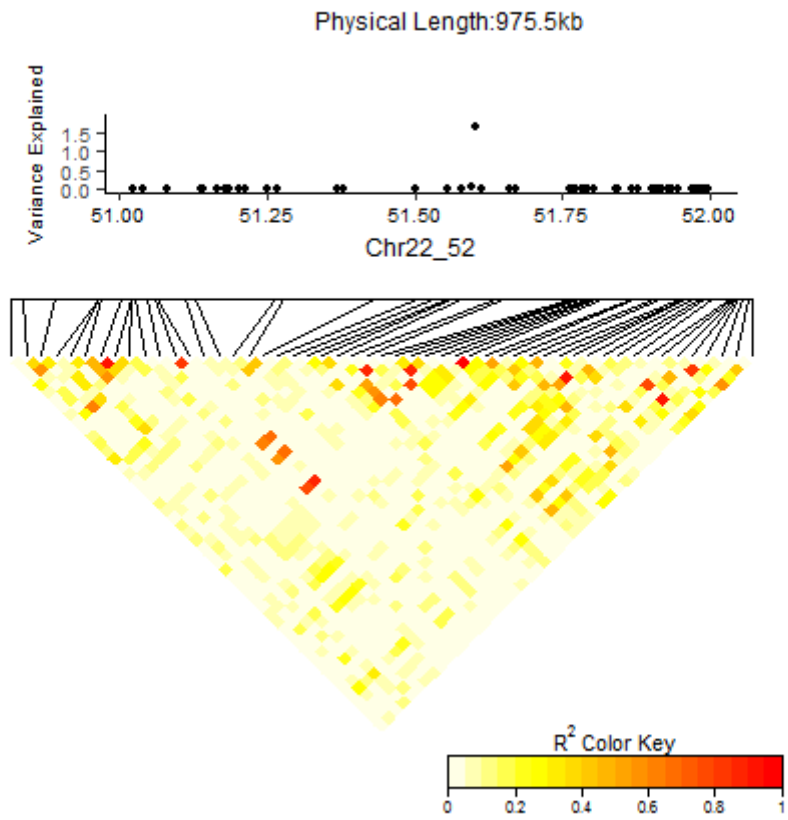

Figure 4h. Manhattan plot of the variance explained by each SNP in the window Chr22\_52 for dEBV<sub>v</sub> and linkage disequilibrium (LD;  $r^2$ )



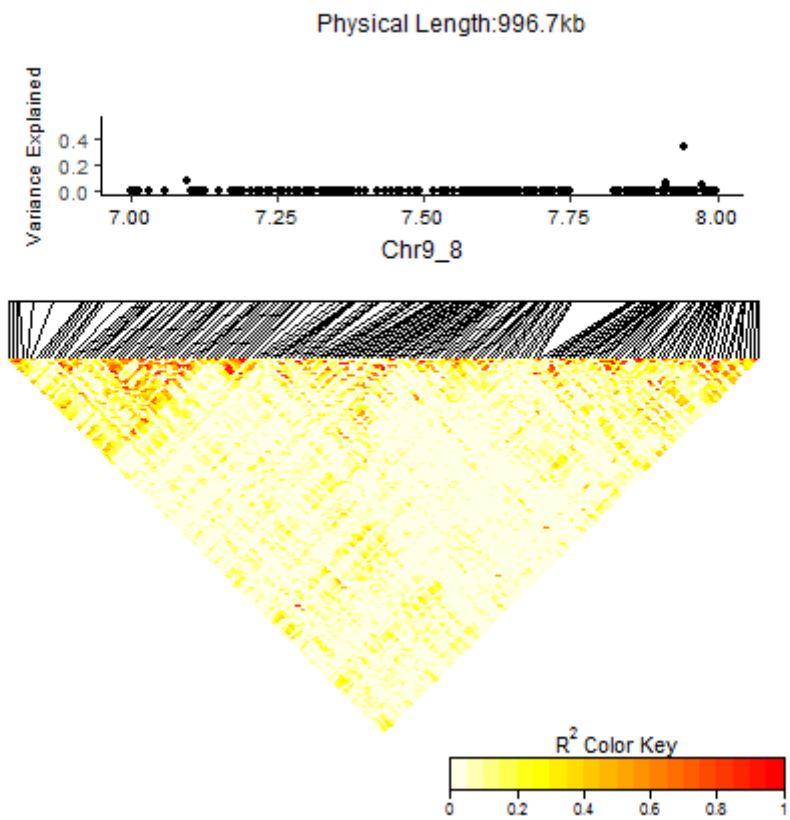

Figure 4i. Manhattan plot of the variance explained by each SNP in the window Chr9\_8 for  $\ln_{\sigma_{\hat{\epsilon}}^2}$  and linkage disequilibrium (LD;  $r^2$ )

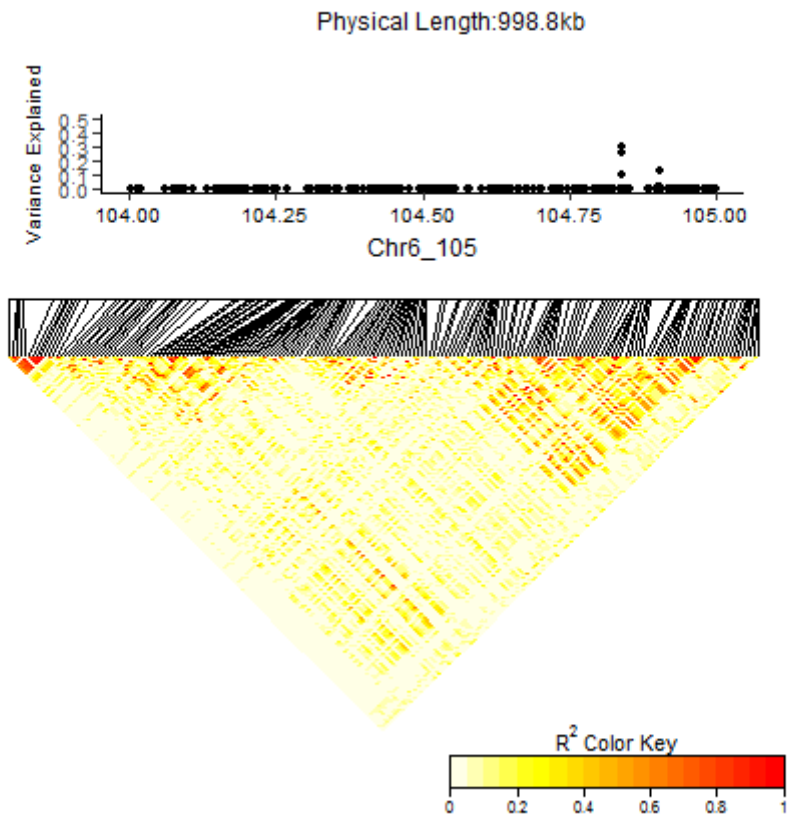

Figure 4j. Manhattan plot of the variance explained by each SNP in the window Chr6\_105 for  $\ln_{\sigma_{\xi}^2}$  and linkage disequilibrium (LD;  $r^2$ )

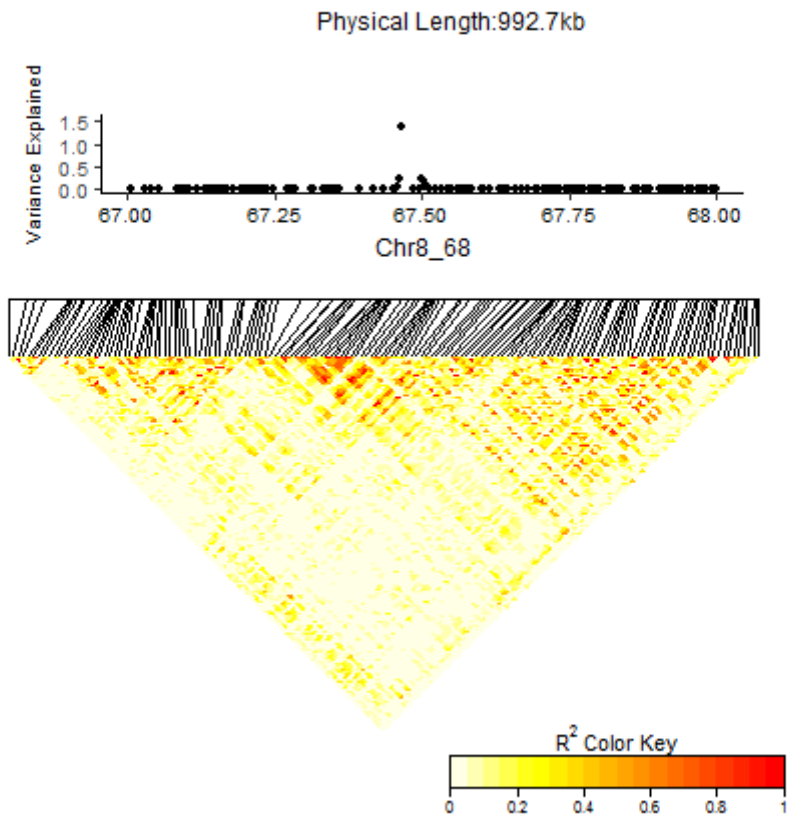

Figure 4k. Manhattan plot of the variance explained by each SNP in the window Chr8\_68 for  $\ln_{\sigma_{\xi}^2}$  and linkage disequilibrium (LD;  $r^2$ )

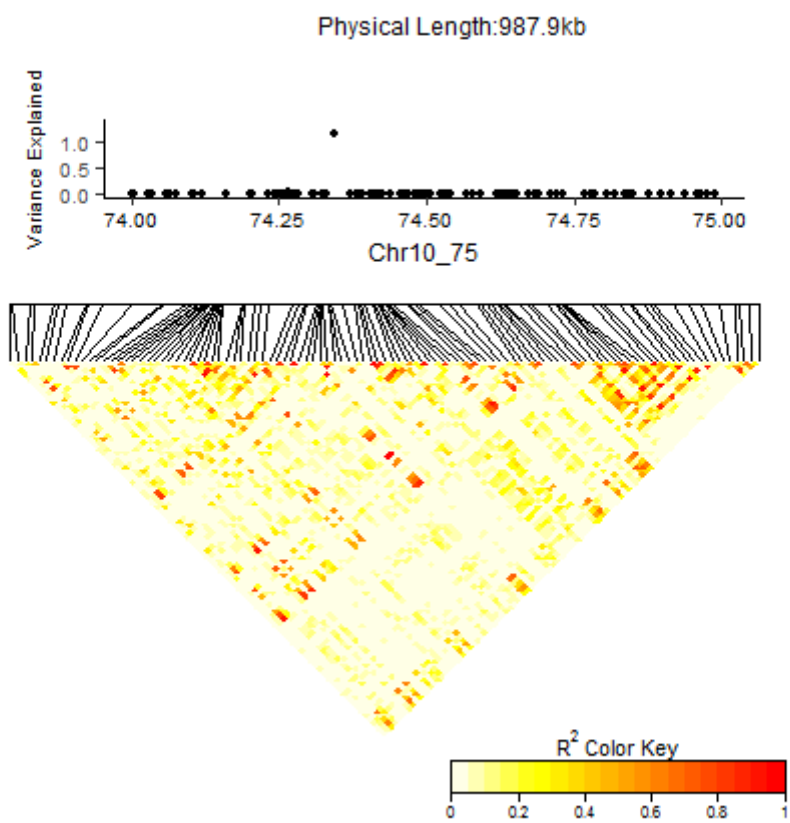

Figure 41. Manhattan plot of the variance explained by each SNP in the window Chr10\_75 for  $\ln_{\sigma_{\xi}^2}$  and linkage disequilibrium (LD;  $r^2$ )

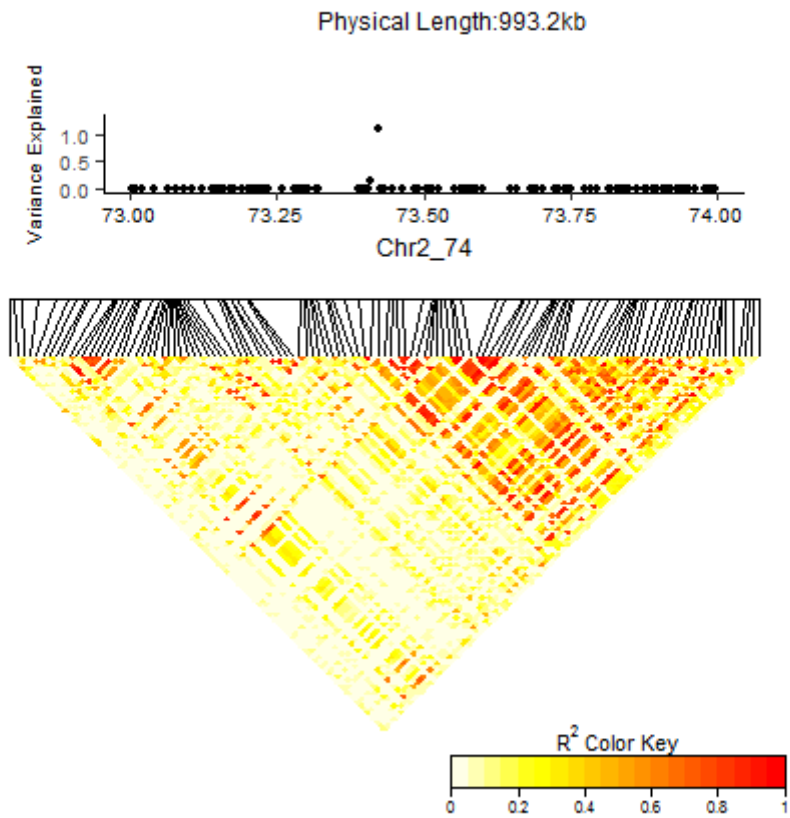

Figure 4m. Manhattan plot of the variance explained by each SNP in the window Chr2\_74 for  $\ln_{\sigma_{\xi}^2}$  and linkage disequilibrium (LD;  $r^2$ )

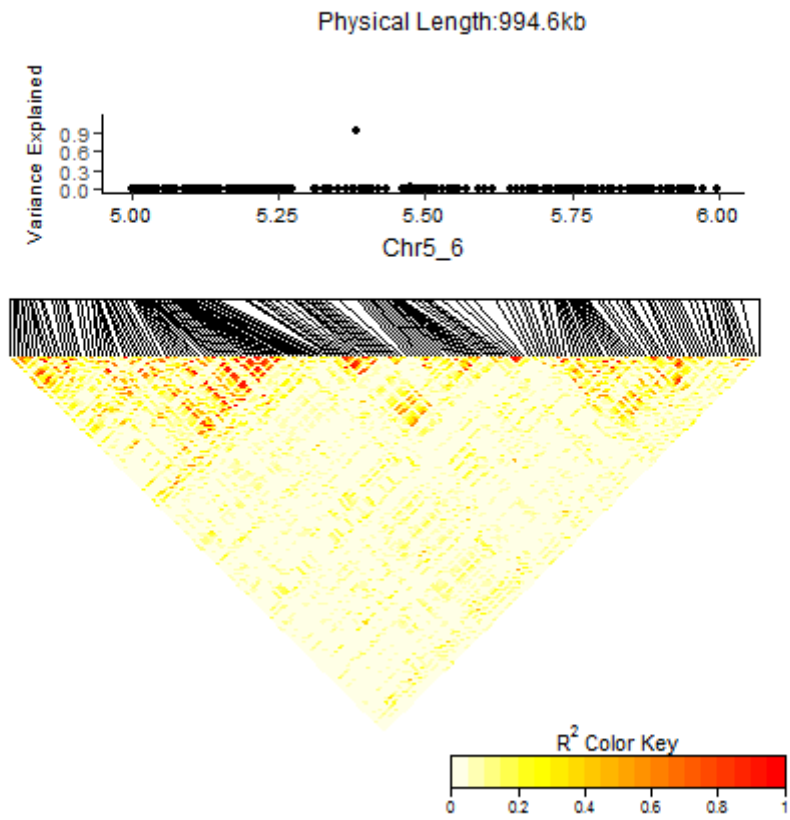

Figure 4n. Manhattan plot of the variance explained by each SNP in the window Chr5\_6 for  $\ln_{\sigma_{\hat{\epsilon}}^2}$  and linkage disequilibrium (LD;  $r^2$ )

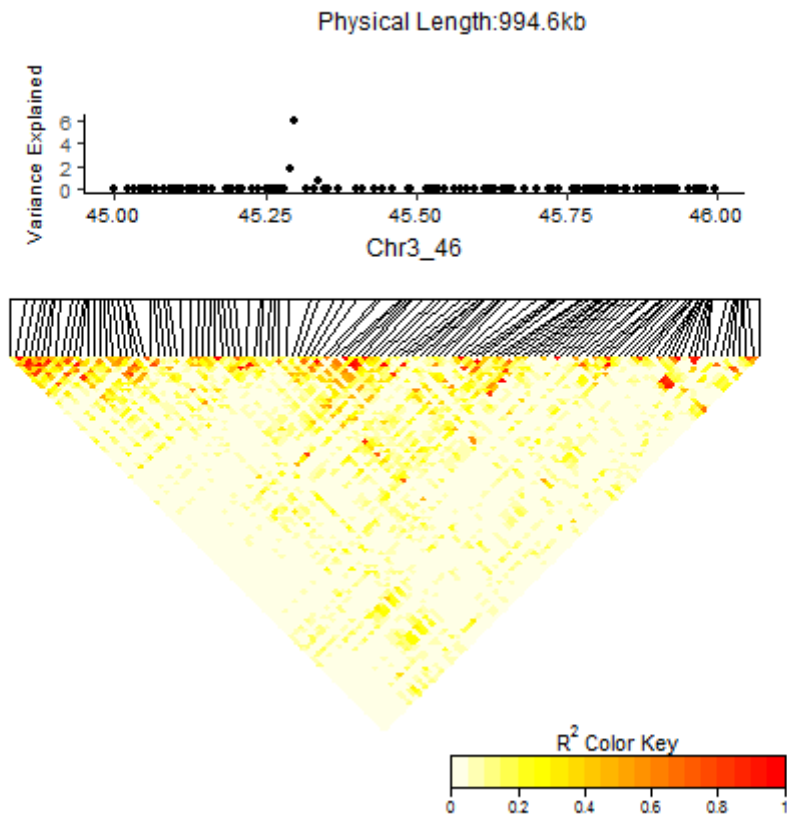

Figure 4p. Manhattan plot of the variance explained by each SNP in the window Chr3\_46 for dEBV<sub>v</sub> and linkage disequilibrium (LD;  $r^2$ )

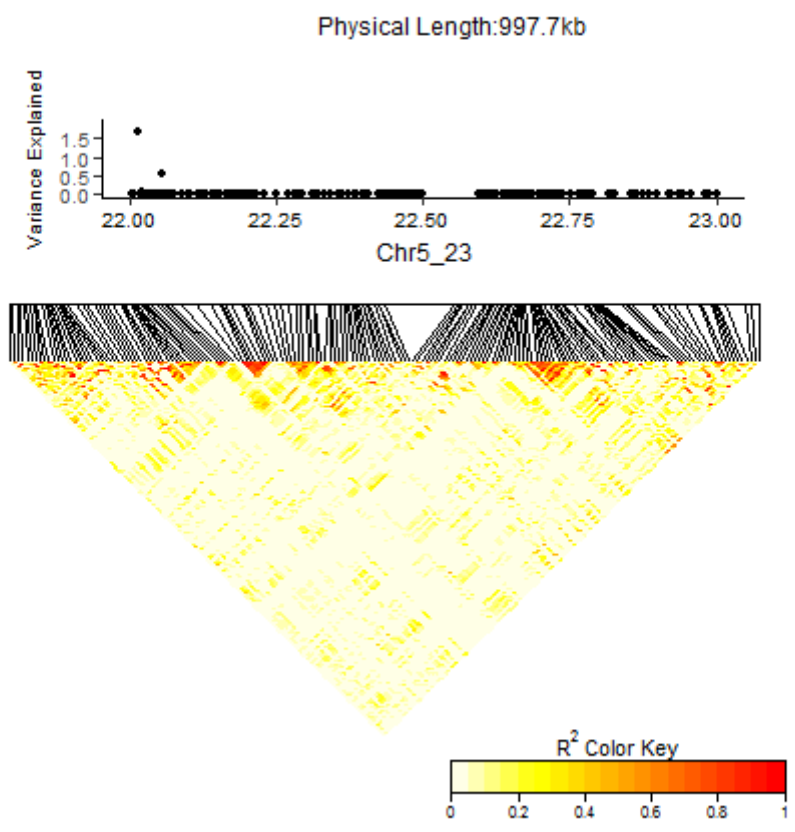

Figure 4q. Manhattan plot of the variance explained by each SNP in the window Chr5\_23 for dEBV<sub>v</sub> and linkage disequilibrium (LD;  $r^2$ )



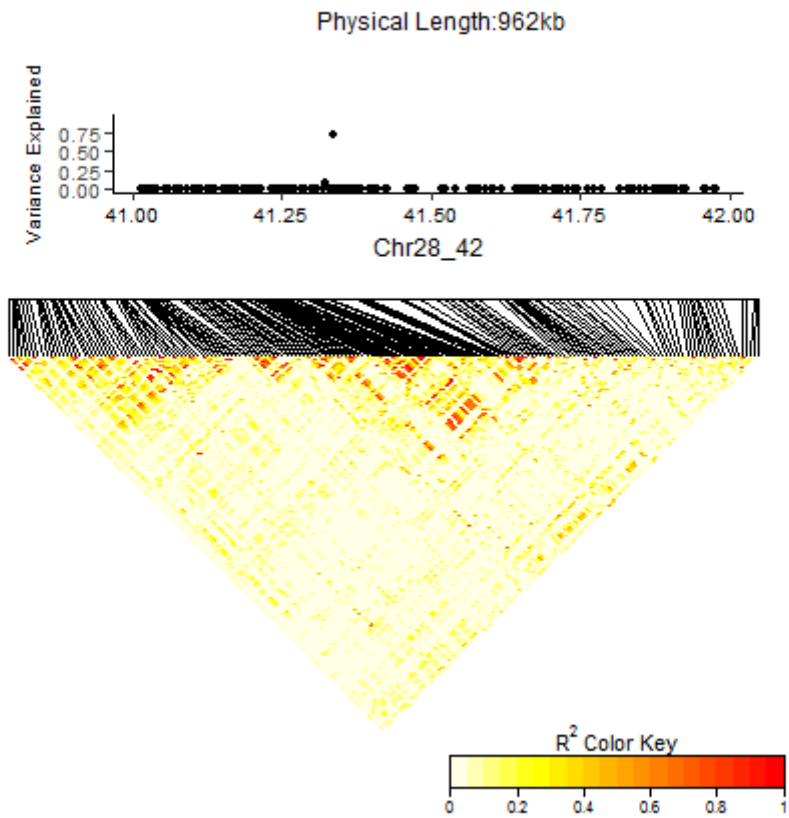

Figure 4r. Manhattan plot of the variance explained by each SNP in the window Chr28\_42 for  $dEBV_v$  and linkage disequilibrium (LD;  $r^2$ )

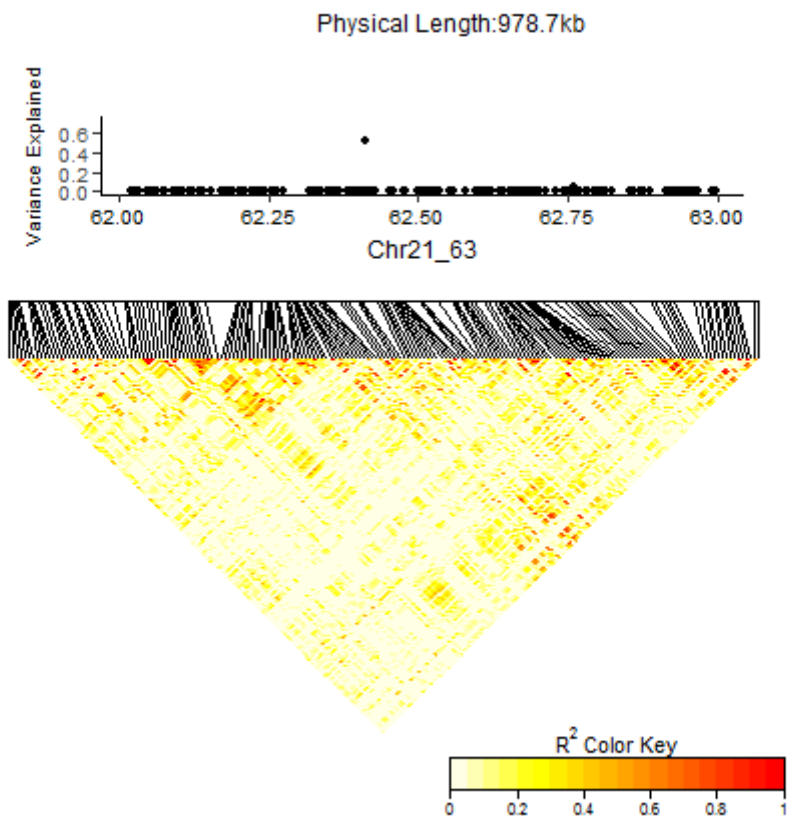

Figure 4s. Manhattan plot of the variance explained by each SNP in the window Chr21\_63 for dEBV<sub>v</sub> and linkage disequilibrium (LD;  $r^2$ )

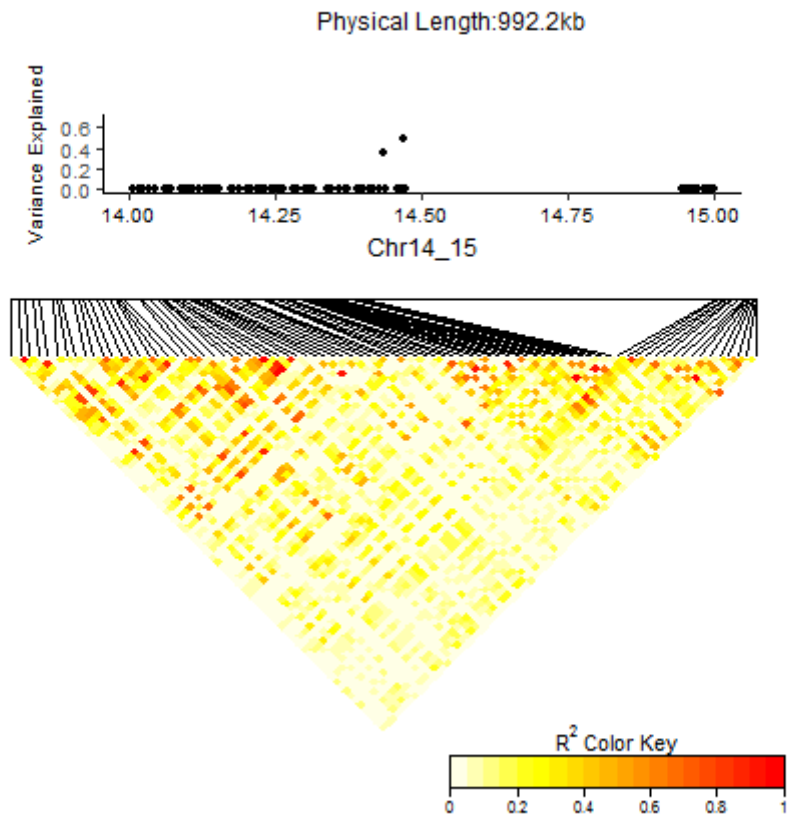

Figure 4t. Manhattan plot of the variance explained by each SNP in the window Chr14\_15 for dEBV<sub>v</sub> and linkage disequilibrium (LD;  $r^2$ )
